# Supplementary material
Source: PubMed Central journal article supplement (PMC5805042)
Supplement: tpmd170225.SD1.pdf [file tpmd170225.SD1.pdf]

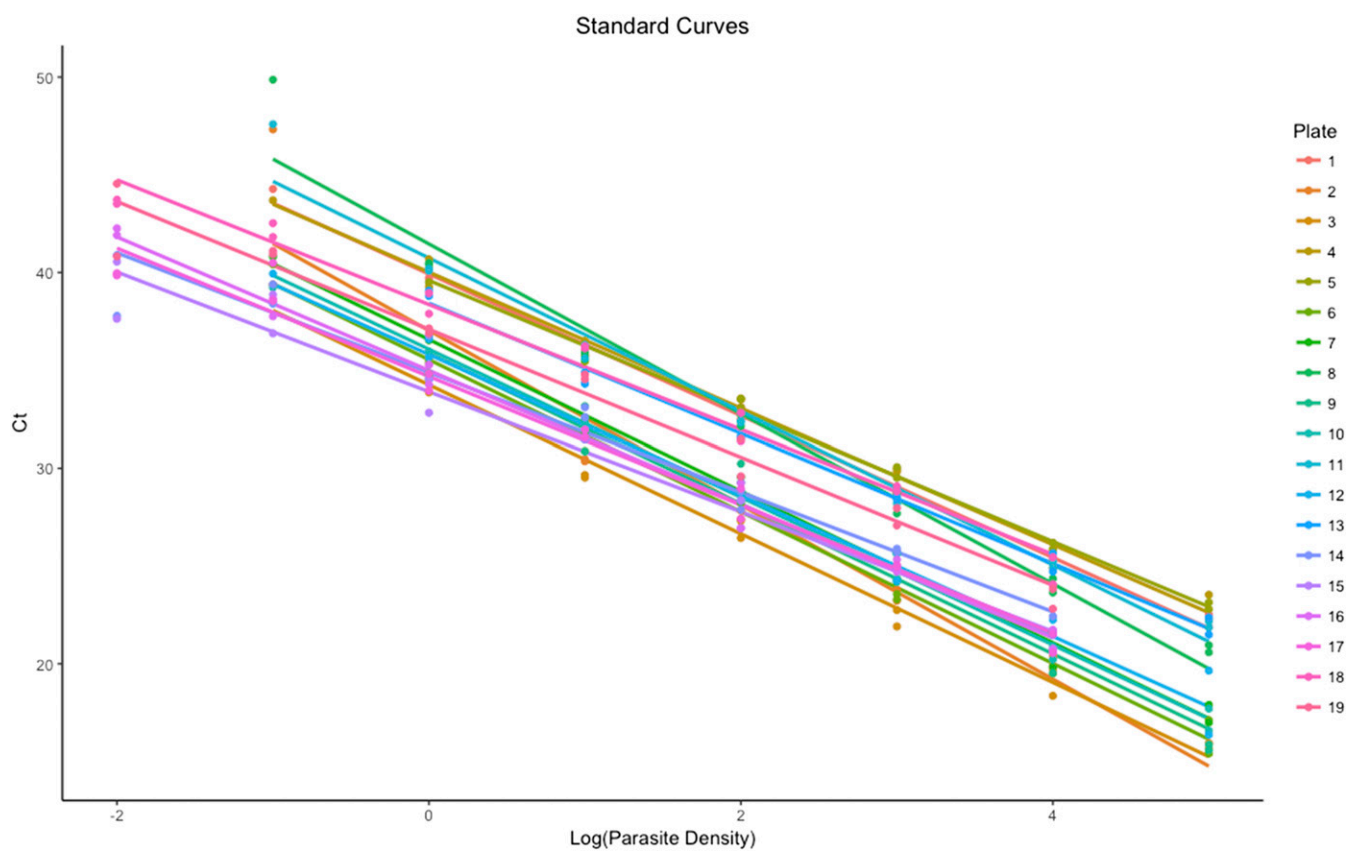

SUPPLEMENTAL FIGURE 1. Standard curves of varATS qPCR products. Log parasite densities are plotted on the x-axis, threshold cycles are plotted on the y-axis.
